# Supplementary material
Source: publisher figshare collection journal article supplement (https://springernature.figshare.com/ndownloader/files/7089551)
Supplement: Supplementary file [file 7089551]

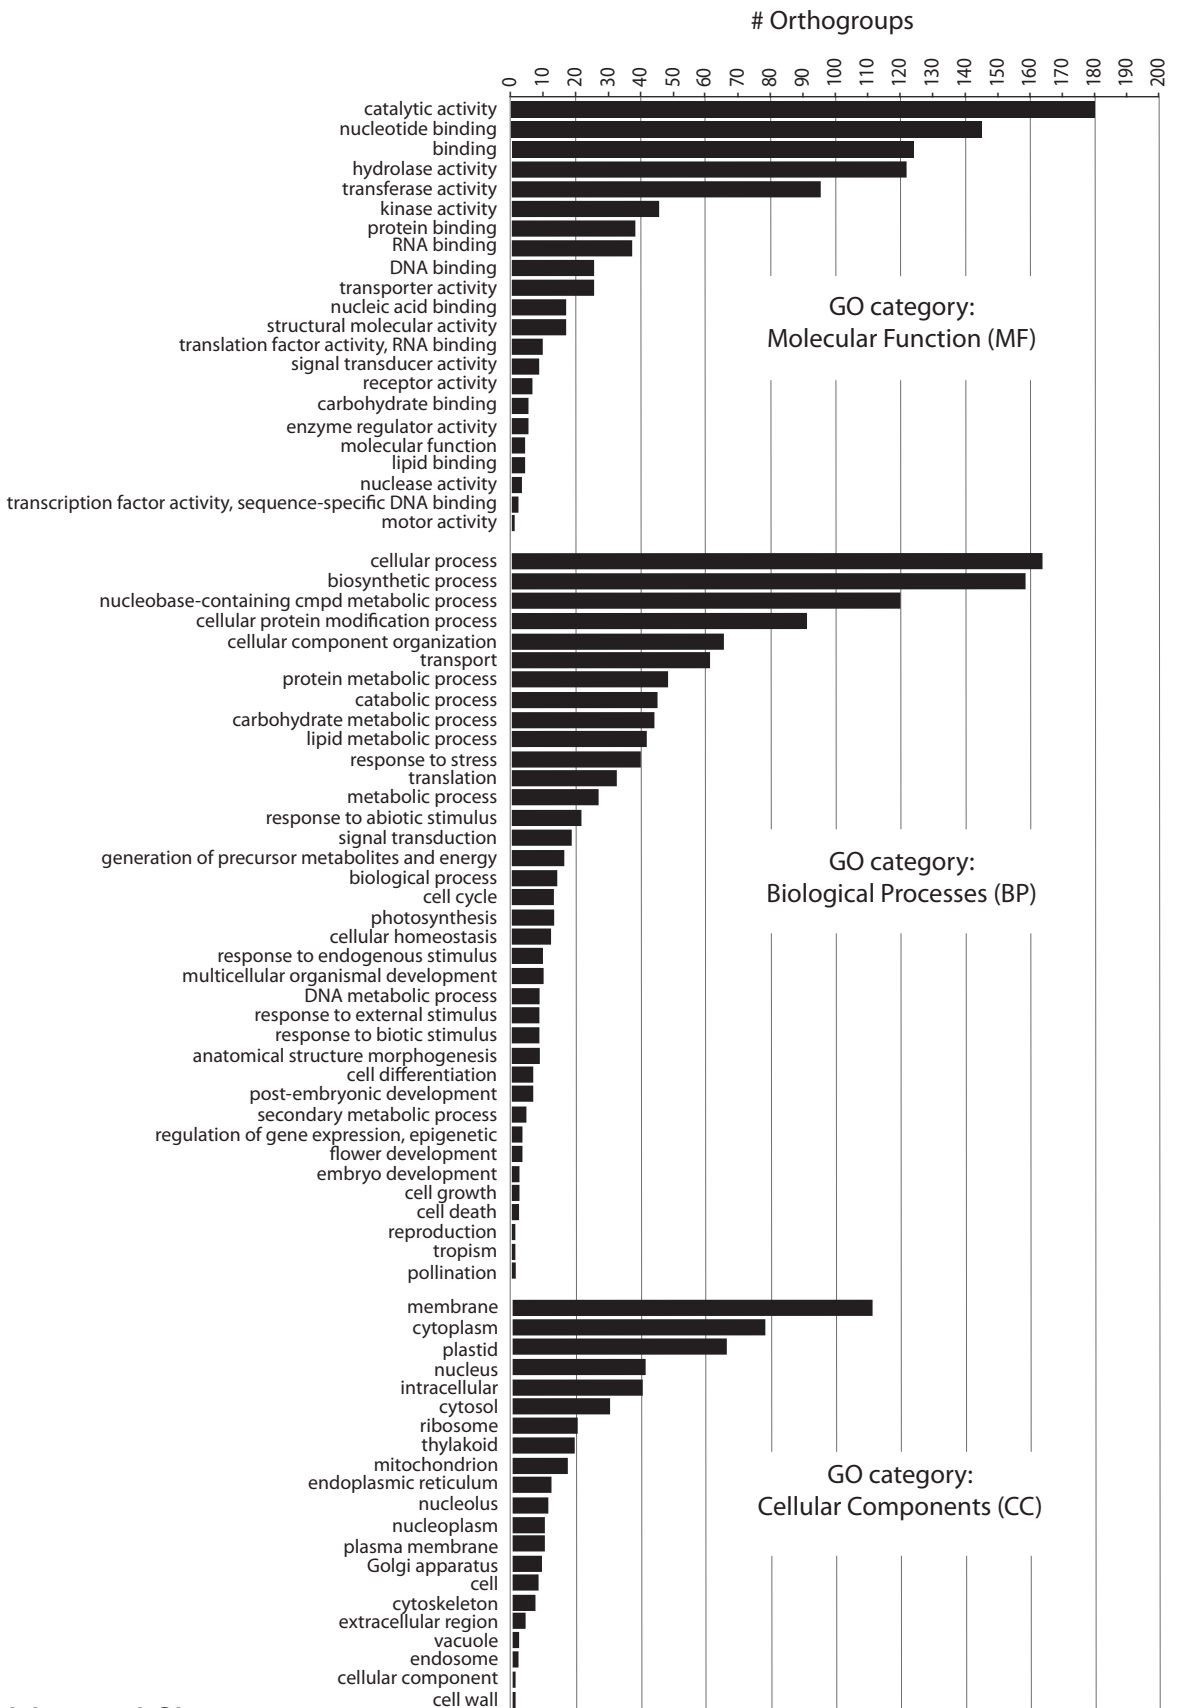

**Additional file 7**

Summary of GO categories corresponding to molecular function, biological processes, and cellular compartments, and the number of orthogroups with annotations assigned to each.
